# Supplementary material for: Diagnostic performance of axillary ultrasound and standard breast MRI for differentiation between limited and advanced axillary nodal disease in clinically node-positive breast cancer patients
Source: PubMed Central journal article supplement (PMC6877558; doi:10.1038/s41598-019-54017-0), 2019-11-25
Supplement: 41598_2019_54017_MOESM1_ESM.pdf [file 41598_2019_54017_MOESM1_ESM.pdf]

**Diagnostic performance of axillary ultrasound and standard breast MRI for differentiation between limited and advanced axillary nodal disease in clinically node-positive breast cancer patients**

S. Samiei, MD, T.J.A. van Nijnatten, MD, PhD, H.C. van Beek, MD, M.P.J. Polak, MD,  
A.J.G. Maaskant-Braat, MD, PhD, E.M. Heuts, MD, PhD, S.M.J. van Kuijk, PhD,  
R.J. Schipper, MD, PhD, M.B.I. Lobbes, MD, PhD\*, M.L. Smidt, MD, PhD\*

\*shared last authorship

## Supplementary Material A. Overview of MR protocols for standard breast MRI

### Maxima Medical Centre, Eindhoven, The Netherlands

#### MRI 1: Philips Gyroscan NT 1.5 Tesla

|                      | 2008            | 2009            | 2010            | 2011                                       | 2012                                       | 2013                                       |
|----------------------|-----------------|-----------------|-----------------|--------------------------------------------|--------------------------------------------|--------------------------------------------|
| Coil                 | Sense body coil | Sense body coil | Sense body coil | Sense breast 4-channel/<br>Sense body coil | Sense breast 4-channel/<br>Sense body coil | Sense breast 4-channel/<br>Sense body coil |
| Pixel size (mm)      | 0.7 x 0.7       | 0.7 x 0.7       | 0.7 x 0.7       | 0.7 x 0.7                                  | 0.7 x 0.7                                  | 0.7 x 0.7                                  |
| Repetition time (ms) | 2500            | 2500            | 2500            | 2500                                       | 2500                                       | 2500                                       |
| Echo time (ms)       | 100             | 100             | 100             | 100                                        | 100                                        | 100                                        |
| Echo train length    | 24              | 24              | 24              | 24                                         | 24                                         | 24                                         |
| Flip angle (°)       | 90              | 90              | 90              | 90                                         | 90                                         | 90                                         |
| Slice thickness (mm) | 2.5             | 2.5             | 2.5             | 2.5                                        | 2.5                                        | 2.5                                        |

#### MRI 2: Philips Ingenia R4.2

|                      | 2013                    | 2014                    |
|----------------------|-------------------------|-------------------------|
| Coil                 | Sense breast 16-channel | Sense breast 16-channel |
| Pixel size (mm)      | 0.8 x 0.8               | 0.8 x 0.8               |
| Repetition time (ms) | 3957                    | 3957                    |
| Echo time (ms)       | 110                     | 110                     |
| Echo train length    | 23                      | 23                      |
| Flip angle (°)       | 90                      | 90                      |
| Slice thickness (mm) | 2.5                     | 2.5                     |

**Maastricht University Medical Centre+, Maastricht, The Netherlands**

**MRI 1: Philips Intera 1.5 Tesla**

|                      | 2009            | 2010            | 2011                    | 2012                    | 2013                    | 2014                    |
|----------------------|-----------------|-----------------|-------------------------|-------------------------|-------------------------|-------------------------|
| Coil                 | Sense body coil | Sense body coil | Sense breast 16-channel | Sense breast 16-channel | Sense breast 16-channel | Sense breast 16-channel |
| Pixel size (mm)      | 0.7 x 0.7       | 0.6 x 0.6       | 1.0 x 1.0               | 1.0 x 1.0               | 1.0 x 1.0               | 1.0 x 1.0               |
| Repetition time (ms) | 5922            | 3012            | 2000                    | 2000                    | 2000                    | 2000                    |
| Echo time (ms)       | 110             | 110             | 204                     | 205                     | 205                     | 258                     |
| Echo train length    | 33              | 33              | 80                      | 80                      | 80                      | 96                      |
| Flip angle (°)       | 90              | 90              | 90                      | 90                      | 90                      | 90                      |
| Slice thickness (mm) | 3.0             | 3.0             | 2.0                     | 2.0                     | 2.0                     | 2.0                     |

**MRI 2: Philips Ingenia 1.5 Tesla**

|                      | 2009            | 2010            | 2011                    | 2012                    | 2013                    | 2014                    |
|----------------------|-----------------|-----------------|-------------------------|-------------------------|-------------------------|-------------------------|
| Coil                 | Sense body coil | Sense body coil | Sense breast 16-channel | Sense breast 16-channel | Sense breast 16-channel | Sense breast 16-channel |
| Pixel size (mm)      | 0.7 x 0.7       | 0.6 x 0.6       | 0.9 x 0.9               | 0.9 x 0.9               | 0.9 x 0.9               | 0.9 x 0.9               |
| Repetition time (ms) | 8213            | 6845            | 2000                    | 2000                    | 2000                    | 2000                    |
| Echo time (ms)       | 110             | 110             | 215                     | 218                     | 218                     | 218                     |
| Echo train length    | 29              | 29              | 95                      | 95                      | 95                      | 95                      |
| Flip angle (°)       | 90              | 90              | 90                      | 90                      | 90                      | 90                      |
| Slice thickness (mm) | 3.0             | 3.0             | 2.0                     | 2.0                     | 2.0                     | 2.0                     |
